# Supplementary material for: AlleleAnalyzer: a tool for personalized and allele-specific sgRNA design
Source: Genome Biol. 2019 Aug 15;20:167. doi: 10.1186/s13059-019-1783-3 (PMC6694686; doi:10.1186/s13059-019-1783-3)
Supplement: Supplementary file 2 — Table S2. AlleleAnalyzer guides for SpCas9 and SaCas9 in BEST1 for optimal coverage of the 1000 genomes cohort, as shown in Fig. 3b-e. Guides with “---” as sequence indicate loss of PAM site due to a variant, and therefore non-targetability of that allele. (XLSX 13 kb) [file 13059_2019_1783_MOESM2_ESM.xlsx]

## Sheet: Table S2
chrom	start	stop	ref	alt	cas_type	gRNA_alt	gRNA_ref	strand	variant_position	variant_position_in_guide	scores_ref	offtargcount_ref	scores_alt	offtargcount_alt	locus	id	guide_id
11	61950241	61950261	T	C	SpCas9	CCAAGACAAGGACTCCTTTG	CTAAGACAAGGACTCCTTTG	positive	61950243	21	71	183	42	165	0	1	SpCas9_1
11	61950244	61950264	T	C	SpCas9	AGACAAGGACTCCTTTGTGG	--------------------	negative	61950243	1	0	0	70	179	0	2	SpCas9_2
11	61957969	61957989	T	TCAAACAAA	SaCas9	GTTTGTTTGTTTGTTTGAGA	GTTTGTTTGTTTGTTTGAGA	negative	61957972	8	0	0	0	0	2	16	SaCas9_16
11	61957969	61957989	T	TCAAACAAACAAA	SaCas9	GTTTGTTTGTTTGTTTGAGA	GTTTGTTTGTTTGTTTGAGA	negative	61957972	8	0	0	0	0	2	32	SaCas9_32
11	61957969	61957989	TCAAACAAACAAA	T	SaCas9	GTTTGTTTGTTTGTTTGAGA	GTTTGTTTGTTTGTTTGAGA	negative	61957972	8	0	0	0	0	2	48	SaCas9_48
11	61959389	61959409	G	T	SpCas9	AGGAAGGGCTTCATGGGGTG	AGGAAGGGCGTCATGGGGTG	positive	61959399	13	56	365	33	497	3	4	SpCas9_4
11	61959382	61959402	G	T	SpCas9	GTCAGGCAGGAAGGGCTTCA	GTCAGGCAGGAAGGGCGTCA	positive	61959399	6	67	277	37	476	3	5	SpCas9_5
11	61959383	61959403	G	T	SpCas9	TCAGGCAGGAAGGGCTTCAT	TCAGGCAGGAAGGGCGTCAT	positive	61959399	7	84	190	51	295	3	9	SpCas9_9
11	61959384	61959404	G	T	SpCas9	CAGGCAGGAAGGGCTTCATG	CAGGCAGGAAGGGCGTCATG	positive	61959399	8	77	289	40	460	3	10	SpCas9_10
11	61962743	61962763	T	C	SaCas9	TCAAGTGAGGAGGAAAACCG	TCAAGTGAGGAGGAAAACTG	positive	61962762	7	53	351	61	169	4	1	SaCas9_1
11	61962758	61962778	T	C	SpCas9	AACCGTGGAGTTTAACCTGA	AACTGTGGAGTTTAACCTGA	positive	61962762	19	64	199	45	67	4	5	SpCas9_5
11	61962743	61962763	T	C	SpCas9	TCAAGTGAGGAGGAAAACCG	TCAAGTGAGGAGGAAAACTG	positive	61962762	4	53	351	61	169	4	6	SpCas9_6
11	61962763	61962783	T	C	SpCas9	TGGAGTTTAACCTGACGGAT	--------------------	negative	61962762	1	0	0	92	61	4	10	SpCas9_10
11	61955176	61955196	C	A	SaCas9	--------------------	ACGAAGGAAATGGGGATGAG	negative	61955173	2	42	458	0	0	6	1	SaCas9_1
11	61955175	61955195	C	A	SpCas9	--------------------	CGAAGGAAATGGGGATGAGC	negative	61955173	0	61	239	0	0	6	3	SpCas9_3
11	61963756	61963776	C	A	SaCas9	TGGGATGGGTGTGGAGGCAA	TGGGCTGGGTGTGGAGGCAA	positive	61963761	21	28	1251	33	1006	7	1	SaCas9_1
11	61963736	61963756	C	A	SaCas9	AATATTTAAGAATCTTGTCT	--------------------	positive	61963761	1	0	0	48	577	7	2	SaCas9_2
11	61963757	61963777	C	A	SpCas9	GGGATGGGTGTGGAGGCAAG	GGGCTGGGTGTGGAGGCAAG	positive	61963761	19	22	1136	21	1175	7	3	SpCas9_3
11	61963741	61963761	C	A	SpCas9	TTAAGAATCTTGTCTTGGGA	TTAAGAATCTTGTCTTGGGC	positive	61963761	3	52	453	50	337	7	4	SpCas9_4
11	61963742	61963762	C	A	SpCas9	TAAGAATCTTGTCTTGGGAT	TAAGAATCTTGTCTTGGGCT	positive	61963761	4	59	321	54	224	7	6	SpCas9_6
11	61963747	61963767	C	A	SpCas9	ATCTTGTCTTGGGATGGGTG	ATCTTGTCTTGGGCTGGGTG	positive	61963761	9	20	805	52	312	7	7	SpCas9_7
11	61963750	61963770	C	A	SpCas9	TTGTCTTGGGATGGGTGTGG	TTGTCTTGGGCTGGGTGTGG	positive	61963761	12	3	4434	13	1424	7	8	SpCas9_8
11	61960314	61960334	G	A	SpCas9	GCCTATGATCAGTGATGCAG	GCCTGTGATCAGTGATGCAG	positive	61960319	18	66	201	42	105	8	1	SpCas9_1
11	61960318	61960338	G	A	SpCas9	TCCACTGCATCACTGATCAT	TCCACTGCATCACTGATCAC	negative	61960319	3	66	184	44	235	8	2	SpCas9_2
11	61963841	61963861	C	CAA	SpCas9	CCAAAAAAAATACAAAAATCAGCT	AAAAAAAATACAAATCAGCT	positive	61963852	12	0	0	0	0	9	2	SpCas9_2
11	61963840	61963860	C	CAA	SpCas9	ACCAAAAAAAATACAAAAATCAGC	CAAAAAAAATACAAATCAGC	positive	61963852	11	0	0	0	0	9	3	SpCas9_3
11	61963849	61963869	C	CAA	SpCas9	AATACAAAAATCAGCTGGGCGTCG	TACAAATCAGCTGGGCGTCG	positive	61963852	20	0	0	0	0	9	4	SpCas9_4
11	61963832	61963852	C	CAA	SpCas9	TTGTATTTTTTTTGGTAGAGAT	GTATTTTTTTTGGTAGAGAT	negative	61963852	22	0	0	0	0	9	5	SpCas9_5
11	61963833	61963853	C	CAA	SpCas9	TTGTATTTTTTTTGGTAGAGA	TGTATTTTTTTTGGTAGAGA	negative	61963852	21	0	0	0	0	9	6	SpCas9_6
11	61963842	61963862	C	CAA	SpCas9	GCTGATTTTTGTATTTTTTT	CAGCTGATTTGTATTTTTTT	negative	61963852	12	0	0	0	0	9	8	SpCas9_8
11	61963840	61963860	C	CAA	SpCas9	CAAAAAAAATACAAATCAGC	--------------------	positive	61963852	11	0	0	0	0	9	11	SpCas9_11
11	61963841	61963861	C	CAA	SpCas9	AAAAAAAATACAAATCAGCT	--------------------	positive	61963852	12	0	0	0	0	9	13	SpCas9_13

## Sheet: table_info
Column header	Description
chrom	Chromosome location of sgRNA
start	Genomic start position of sgRNA
stop	Genomic stop position of sgRNA
alt	Alternate allele
ref	Reference allele
cas_type	Type of cas for the sgRNA
gRNA_alt	sgRNA targeting the alternate allele
gRNA_ref	sgRNA targeting the reference allele
strand	Strand the sgRNA targets
variant_position	Genomic position of the variant
variant_position_in_guide	Position of the variant in the sgRNA, with 0 corresponding the the end of the PAM
scores_ref	CRISPOR predicted specificity score for the sgRNA targeting the reference allele
offtargcount_ref	Number of off-targets (up to 4 mismatches) in the genome identified by CRISPOR
scores_alt	CRISPOR predicted specificity score for the sgRNA targeting the alternate allele
offtargcount_alt	Number of off-targets (up to 4 mismatches) in the genome identified by CRISPOR
locus	Name of locus the sgRNA is targeting
id	sgRNA ID in that locus
guide_id	Unique sgRNA ID for the overall set
