# Supplementary material for: AlleleAnalyzer: a tool for personalized and allele-specific sgRNA design
Source: Genome Biol. 2019 Aug 15;20:167. doi: 10.1186/s13059-019-1783-3 (PMC6694686; doi:10.1186/s13059-019-1783-3)
Supplement: Supplementary file 3 — Table S3. Comparison of AlleleAnalyzer features with other commonly used CRISPR sgRNA design tools. (XLSX 12 kb) [file 13059_2019_1783_MOESM3_ESM.xlsx]

## Sheet: Table S3
Column1	Personalized sgRNA design	Allele-specific sgRNA design	Supports any genome	Paired sgRNA design	Optimizes pairs of sgRNAs to maximize coverage in a cohort	Single or multi-locus design	Multiple Cas varieties	Ability to add novel Cas enzymes	Off-target scoring
AlleleAnalyzer	yes	yes	yes	yes	yes	yes	yes	yes	yes
CRISPOR (Haeussler et al. 2016)	no	no	yes	no	no	yes	yes	no	yes
GuideScan (Perez et al. 2017)	no	no	no	yes	no	yes	yes	no	yes
E-CRISP (Heigwer et al. 2014)	no	no	no	yes	no	yes	no	no	yes
MIT design tool (Hsu et al. 2013)	no	no	no	no	no	yes	no	no	yes
CRISPRscan (Moreno-Mateos et al. 2015)	no	no	no	no	no	no	yes	no	yes
FlashFry (McKenna & Shendure, 2018)	no	no	yes	no	no	yes	yes	no	yes

## Sheet: table_info
Column header	Description
Personalized sgRNA design	Whether the tool enables personalized sgRNA design that incorporates and accomodates genetic variation
Allele-specific sgRNA design	Whether the tool enables allele-specific sgRNA design
Supports any genome	Whether the tool can support any genome given
Paired sgRNA design	Whether the tool supports design of paired sgRNAs
Optimizes pairs of sgRNAs to maximize coverage in a cohort	Whether the tool has options to maximize coverage of a cohort with sgRNA combinations
Single or multi-locus design	Whether the tool can design sgRNAs for multiple loci as well as a single locus
Multiple Cas varieties	Whether the tool can design sgRNAs for multiple types of Cas enzymes
Ability to add novel Cas enzymes	Whether the tool allows the user to add novel Cas enzymes
Off-target scoring	Whether the tool enables off-target (specificity prediction) scoring
